# Supplementary material for: The SAlzburg PEritoneal SUrface CAlculator (SAPESUCA): The First Web-Based Application for Peritoneal Surface Area Quantification
Source: MDPI journal article supplement (doi:10.3390/cancers15123134), 2023-06-10
Supplement: s1 [file s1]

# Supplementary Materials:

**Table S1.** Forty anatomical peritoneal regions grouped in supra-, and infracolic visceral, and parietal peritoneum based on [1] and their rearrangement into 13 Peritoneal Cancer Index (PCI) regions shown in *(brackets)* based on [2].

| No. | Supracolic peritoneum, visceral area                 | Supracolic peritoneum, parietal area                      | Infracolic peritoneum, visceral area                            | Infracolic peritoneum, parietal area                      |
|-----|------------------------------------------------------|-----------------------------------------------------------|-----------------------------------------------------------------|-----------------------------------------------------------|
| 1   | Liver<br>(1: Right upper)                            | Right diaphragmatic wall<br>(1: Right upper)              | Mesentery<br>(9-12: Upper/Lower jejunum, Upper/Lower ileum)     | Right antero-lateral infraumbilical wall<br>(0: Central)  |
| 2   | Gastrocolic ligament<br>(0: Central)                 | Left diaphragmatic wall<br>(3: Left upper)                | Jejunum-ileum<br>(9-12: Upper/Lower jejunum, Upper/Lower Ileum) | Left antero-lateral infraumbilical wall<br>(0: Central)   |
| 3   | Stomach<br>(3: Left upper)                           | Right antero-lateral supraumbilical wall<br>(0: Central)  | Greater omentum<br>(0: Central)                                 | Left dorsal infracolic parietal wall<br>(4: Left flank)   |
| 4   | Spleen<br>(3: Left upper)                            | Left antero-lateral supraumbilical wall<br>(0: Central)   | Sigmoid colon<br>(5: Left lower)                                | Right dorsal infracolic parietal wall<br>(8: Right flank) |
| 5   | Transverse mesocolon: superior layer<br>(0: Central) | Right dorsal supracolic parietal wall<br>(1: Right upper) | Transverse colon<br>(0: Central)                                | Left lateral pelvic wall<br>(5: Left lower)               |
| 6   | Lesser omentum<br>(2: Epigastrium)                   | Left dorsal supracolic parietal wall<br>(3: Left upper)   | Transverse mesocolon: inferior layer<br>(0: Central)            | Right lateral pelvic wall<br>(7: Right lower)             |
| 7   | Falciform ligament<br>(2: Epigastrium)               |                                                           | Caecum v. appendix ascending colon<br>(8: Right flank)          |                                                           |
| 8   | Pancreas<br>(0: Central)                             |                                                           | Sigmoid mesocolon<br>(5: Left lower)                            |                                                           |
| 9   | Gastrosplenic ligament<br>(3: Left upper)            |                                                           | Uterus and broad ligaments<br>(6: Pelvis)                       |                                                           |
| 10  | Teres ligament<br>(2: Epigastrium)                   |                                                           | Rectum<br>(6: Pelvis)                                           |                                                           |
| 11  | Duodenum<br>(1: Right upper)                         |                                                           | Descending colon<br>(4: Left flank)                             |                                                           |
| 12  | Left triangular ligament<br>(2: Epigastrium)         |                                                           | Urinary bladder<br>(6: Pelvis)                                  |                                                           |
| 13  | Gall bladder<br>(1: Right upper)                     |                                                           |                                                                 |                                                           |
| 14  | Lienorenal ligament<br>(3: Left upper)               |                                                           |                                                                 |                                                           |
| 15  | Right triangular ligament<br>(1: Right upper)        |                                                           |                                                                 |                                                           |
| 16  | Abdominal esophagus                                  |                                                           |                                                                 |                                                           |

(3: Left upper)

**Table S2.** Peritoneal surface area (cm<sup>2</sup>) before and after cytoreductive surgery in all 13 Peritoneal Cancer Index (PCI) regions. Data of all procedures are shown as mean  $\pm$  SD and range (minimum [min] and maximum [max]).

| Region        | Peritoneal surface area before cytoreductive surgery |           |            |            | Peritoneal surface area after cytoreductive surgery |           |            |            |
|---------------|------------------------------------------------------|-----------|------------|------------|-----------------------------------------------------|-----------|------------|------------|
|               | <i>mean</i>                                          | <i>SD</i> | <i>min</i> | <i>max</i> | <i>mean</i>                                         | <i>SD</i> | <i>min</i> | <i>max</i> |
| Central       | 3,163                                                | 332       | 2,386      | 3,163      | 1,646                                               | 755       | 62         | 1,646      |
| Right Upper   | 2,219                                                | 232       | 1,673      | 2,219      | 1,995                                               | 440       | 928        | 1,995      |
| Epigastrium   | 939                                                  | 99        | 708        | 939        | 447                                                 | 185       | 0          | 447        |
| Left Upper    | 1,723                                                | 181       | 1,299      | 1,723      | 1,562                                               | 341       | 474        | 1,562      |
| Left Flank    | 549                                                  | 57        | 414        | 549        | 288                                                 | 240       | 4          | 288        |
| Left Lower    | 1,128                                                | 118       | 851        | 1,128      | 292                                                 | 487       | 0          | 292        |
| Pelvis        | 605                                                  | 64        | 456        | 605        | 345                                                 | 193       | 5          | 345        |
| Right Lower   | 337                                                  | 35        | 254        | 337        | 118                                                 | 129       | 0          | 118        |
| Right Flank   | 650                                                  | 68        | 490        | 650        | 305                                                 | 300       | 0          | 305        |
| Upper Jejunum | 1,825                                                | 191       | 1,376      | 1,825      | 1,812                                               | 179       | 1,376      | 1,812      |
| Lower Jejunum | 1,825                                                | 191       | 1,376      | 1,825      | 1,804                                               | 171       | 1,376      | 1,804      |
| Upper Ileum   | 1,825                                                | 191       | 1,376      | 1,825      | 1,667                                               | 515       | 0          | 1,667      |
| Lower Ileum   | 1,825                                                | 191       | 1,376      | 1,825      | 1,399                                               | 646       | 0          | 1,399      |

**Table S3.** Resected peritoneal surface area in cm<sup>2</sup> in all 13 Peritoneal Cancer Index (PCI) regions. Data of all patients are shown as mean  $\pm$  SD and range (minimum [min] and maximum [max]).

| Region        | mean  | SD  | min | max   |
|---------------|-------|-----|-----|-------|
| Central       | 1,517 | 737 | 691 | 1,517 |
| Right Upper   | 223   | 351 | 0   | 223   |
| Epigastrium   | 492   | 209 | 0   | 492   |
| Left Upper    | 161   | 292 | 0   | 161   |
| Left Flank    | 260   | 244 | 0   | 260   |
| Left Lower    | 836   | 512 | 0   | 836   |
| Pelvis        | 259   | 187 | 0   | 259   |
| Right Lower   | 218   | 141 | 0   | 218   |
| Right Flank   | 345   | 306 | 0   | 345   |
| Upper Jejunum | 13    | 32  | 0   | 13    |
| Lower Jejunum | 21    | 58  | 0   | 21    |
| Upper Ileum   | 158   | 507 | 0   | 158   |
| Lower Ileum   | 425   | 649 | 0   | 425   |

## References

1. Albanese, A.M.; Albanese, E.F.; Mino, J.H.; Gomez, E.; Gomez, M.; Zandomeni, M.; and Merlo, A.B. Peritoneal surface area: measurements of 40 structures covered by peritoneum: correlation between total peritoneal surface area and the surface calculated by formulas. *Surg Radiol Anat* **2009**, 31(5), p. 369-377.
2. Jacquet, P. and Sugarbaker, P.H. Clinical research methodologies in diagnosis and staging of patients with peritoneal carcinomatosis. *Cancer Treat Res* **1996**, 82, p. 359-374.
